# Supplementary material for: CCR7 Mediates Cell Invasion and Migration in Extrahepatic Cholangiocarcinoma by Inducing Epithelial–Mesenchymal Transition
Source: MDPI journal article supplement (doi:10.3390/cancers15061878), 2023-03-21

# Figure S1.

## Figure 3. (A)

RT-PCR analysis of CCR7 and  $\beta$ -actin mRNA expression in each cell line.

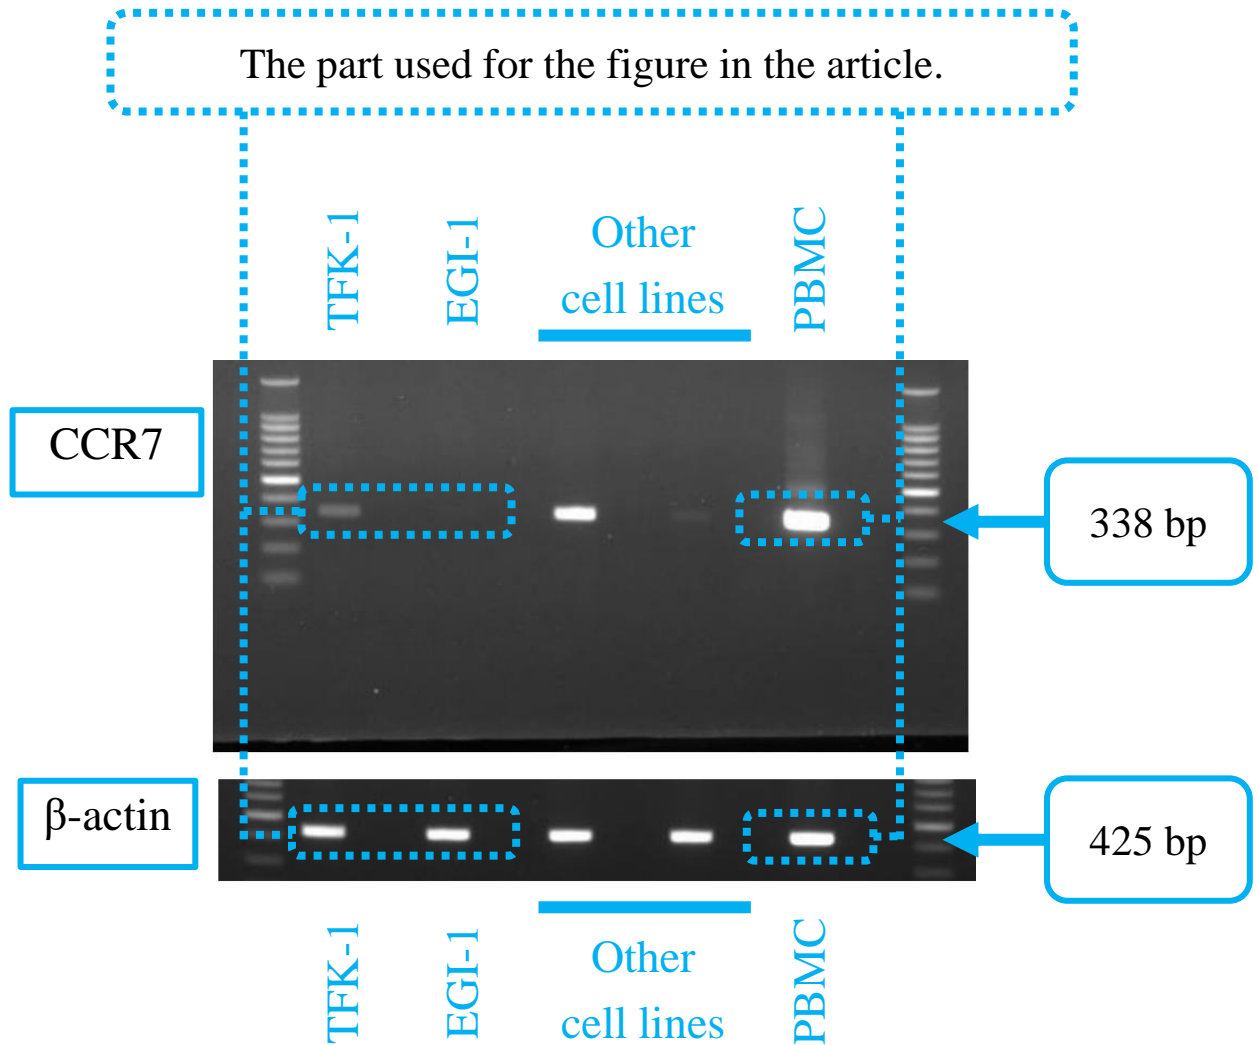

## Figure 3. (B) TFK-1

Changes in E-cadherin, vimentin and  $\beta$ -actin protein levels following treatment with CCL19 in TFK-1.

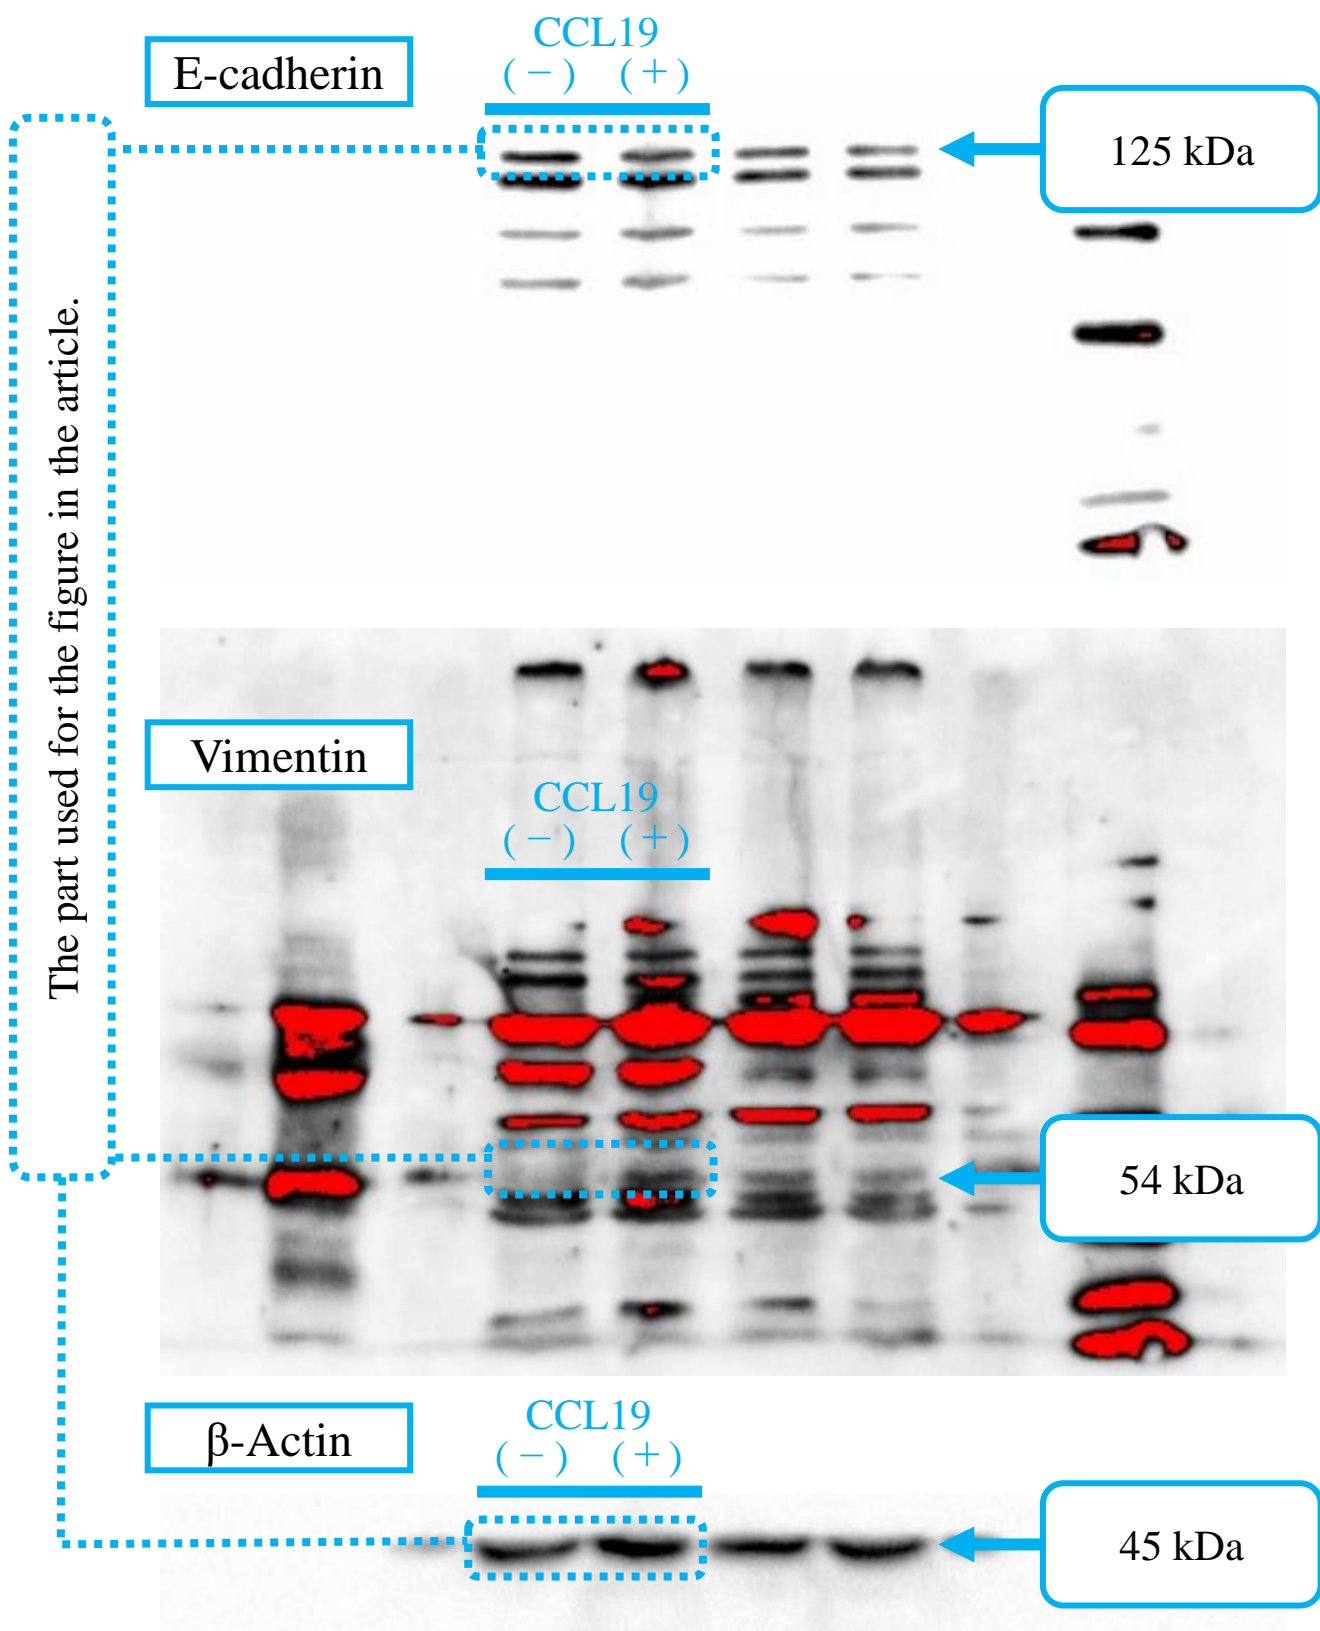

### Figure 3. (B) EGI-1

Changes in E-cadherin, vimentin and  $\beta$ -actin protein levels following treatment with CCL19 in EGI-1.

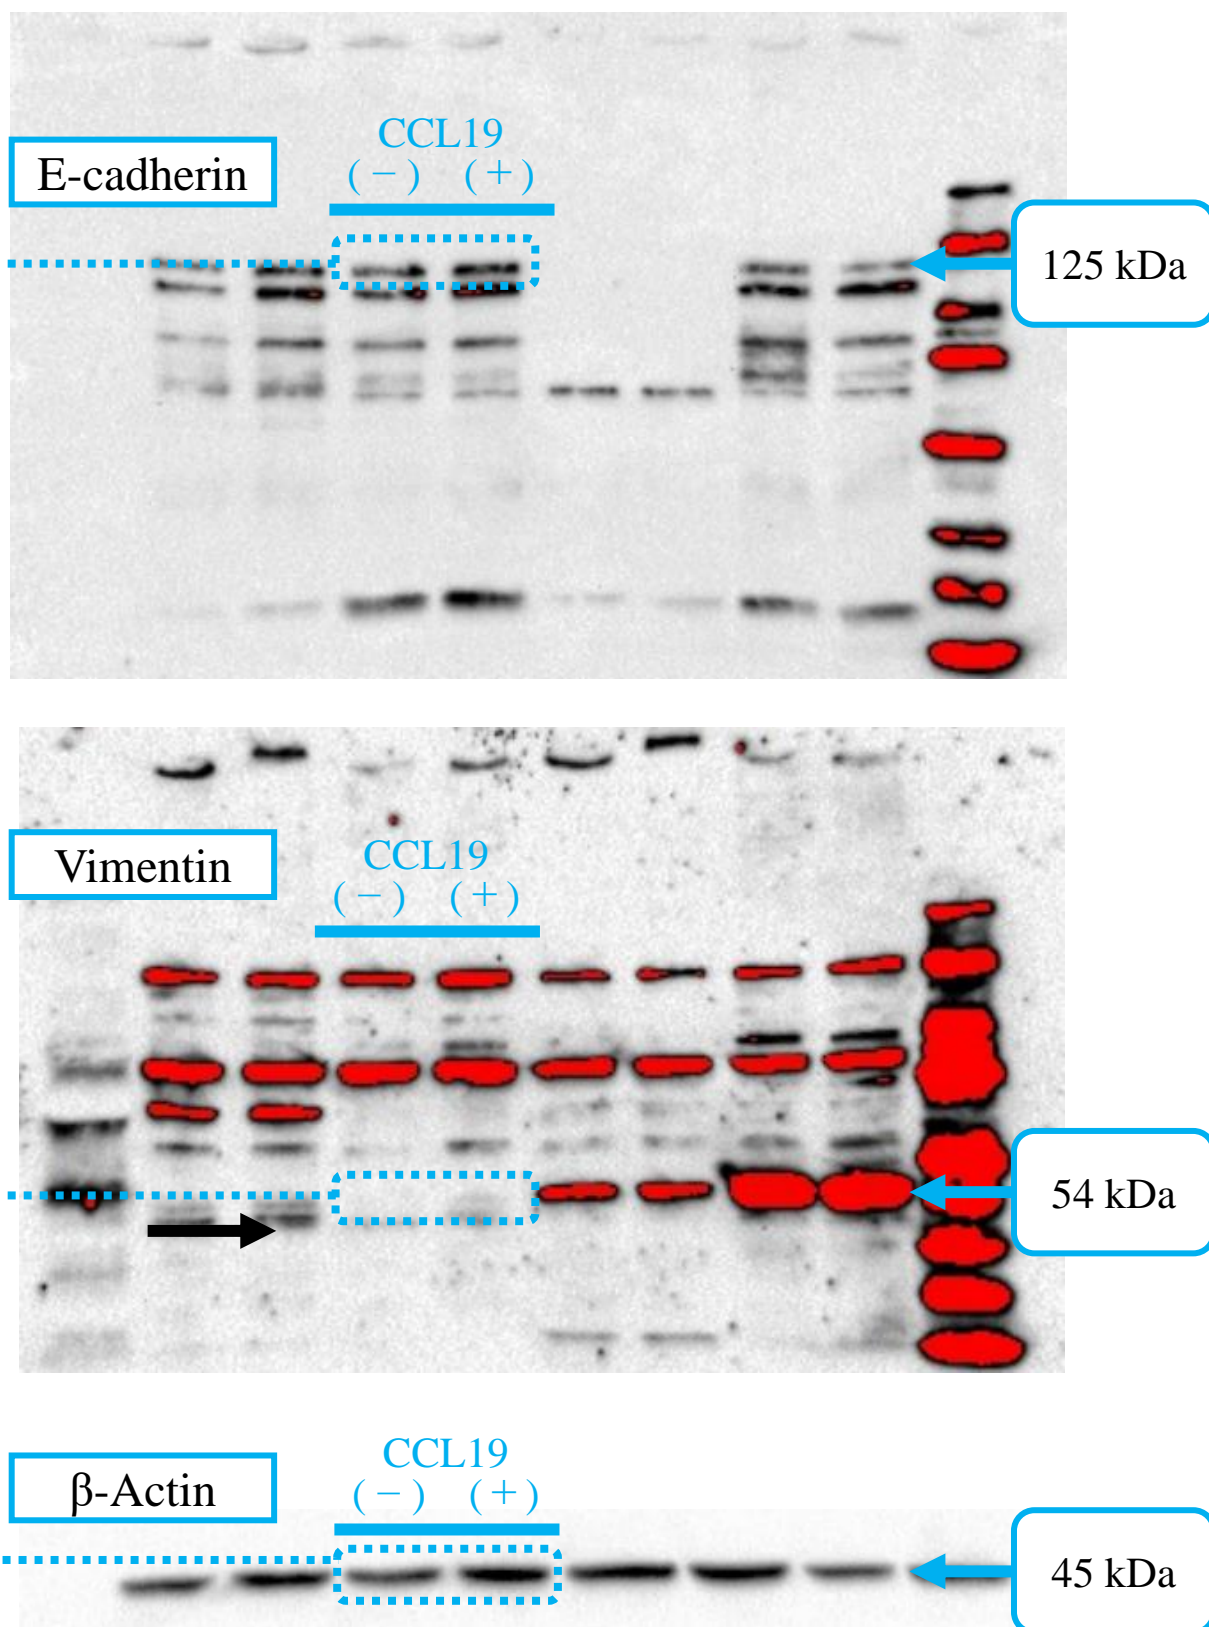

Supplement: s1 [file s1]
